# Supplementary material
Source: publisher figshare collection journal article supplement (https://tandf.figshare.com/ndownloader/files/15248264)
Supplement: Supplementary file 1 [file 15248264]

**Supporting Information**

# Corrosion behavior investigation of 460 low alloy steels exposed in the natural deep-sea environment

Tigang Duan, Likun Xu *, Kangkang Ding, Wenshan Peng, Jian Hou, Weimin Guo, Wenhua Cheng

*State Key Laboratory for Marine Corrosion and Protection, Luoyang Ship Material Research Institute(LSMRI), Qingdao 266237, China*

*Corresponding author.

Likun Xu: Tel.: +86-13583228231; E-mail address: [xulk@sunrui.net](mailto:xulk@sunrui.net)

**(b)**

**(a)**

**(c)**

| 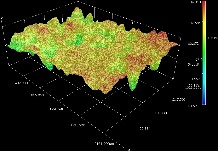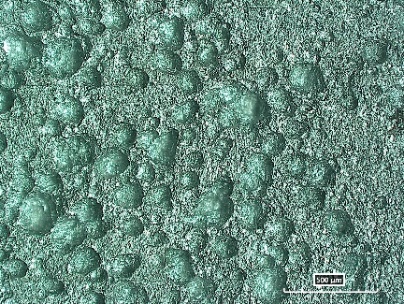  **(d)** | 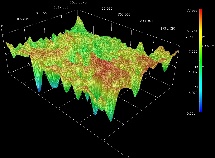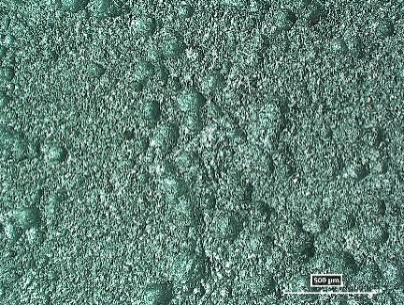  **(e)** | 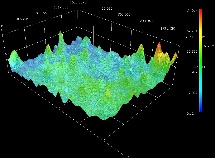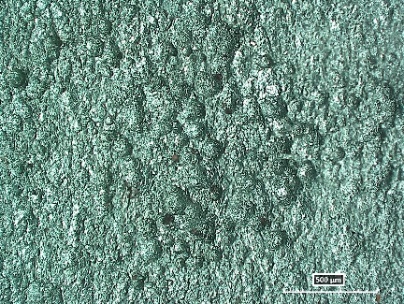  **(f)** |
| --- | --- | --- |
| 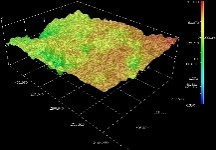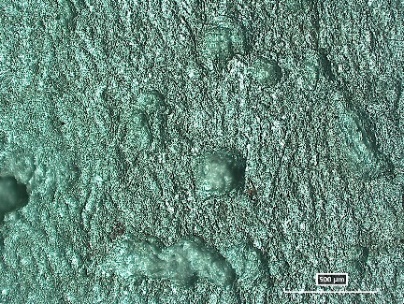  **(g)** | 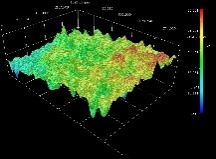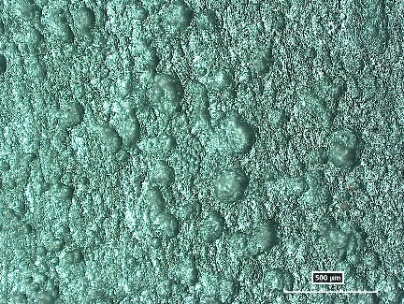  **(h)** | 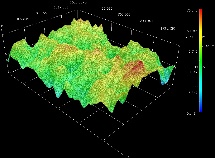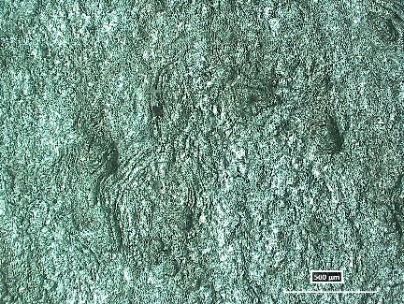  **(i)** |
| 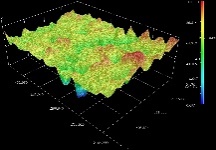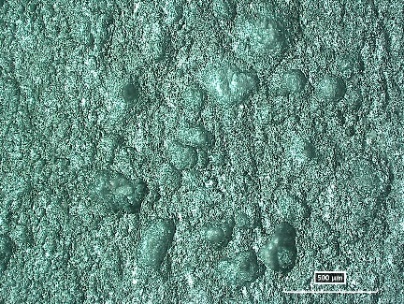 | 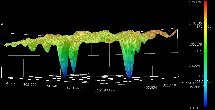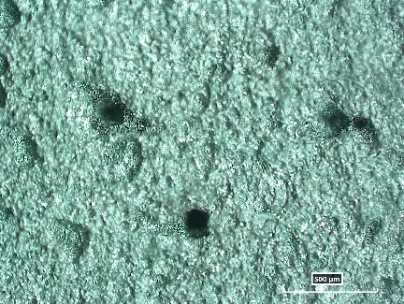 | 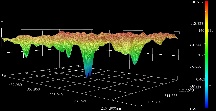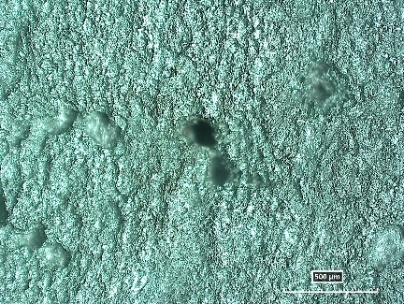  **500 μm** |

Figure S1 Corrosion micro-morphologies of 460 steel after rust removal: (a-c) 0.5a period, (d-f) 1a period, (g-i) 2a period; (a, d, g) 1200 m, (b, e, h) 2000 m, (c, f, i) 3000 m. Insets are the corresponding 3D structure images.
